# Supplementary material
Source: Springer Nature journal article supplement (https://www.springermedizin.de/resource/supplementary/12936_2009_1143_MOESM7_ESM.pdf/9549962)

A.

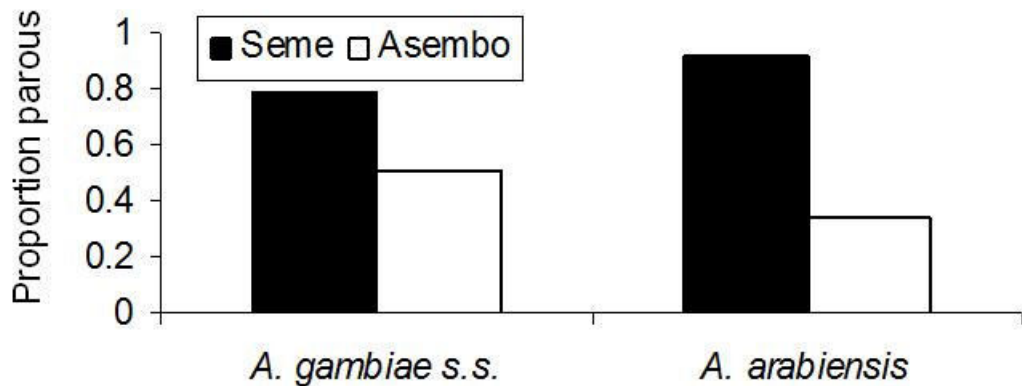

B.

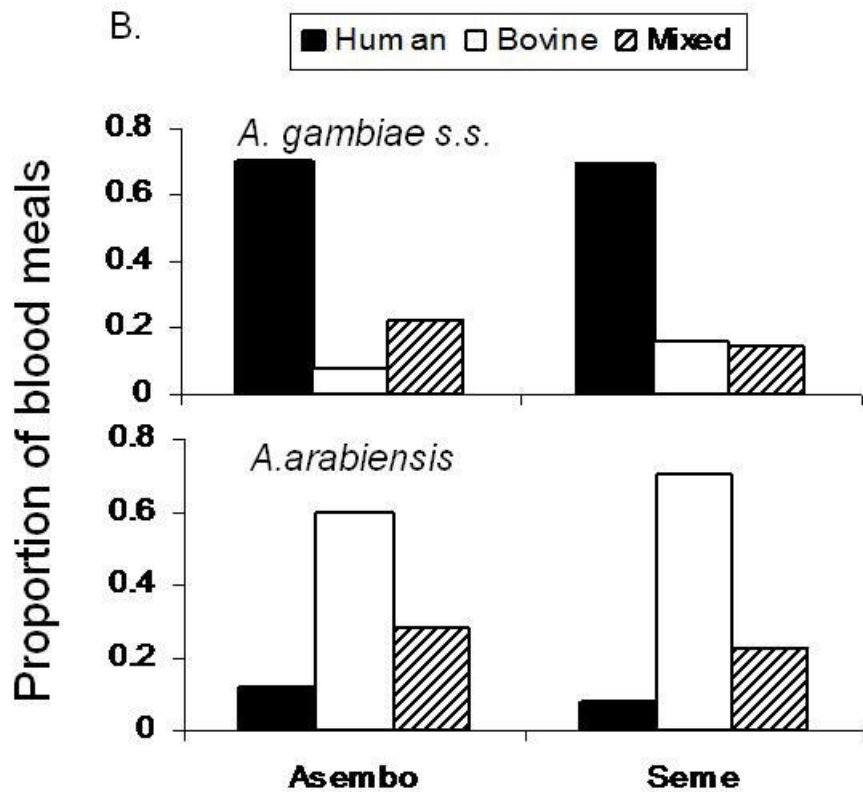

Supplement: MOESM7 [file 9549962]
